# Supplementary material for: Influence of Gelatin and Propolis Extract on Honey Gummy Jelly Properties: Optimization Using D-Optimal Mixture Design
Source: MDPI journal article supplement (doi:10.3390/gels10040282), 2024-04-21
Supplement: s1 [file s1]

# Influence of Gelatin and Propolis Extract on Honey Gummy Jelly Properties: Optimization Using D-Optimal Mixture Design

Kultida Kaewpetch <sup>1</sup>, Saowapa Yolsuriyan <sup>1</sup>, Terd Disayathanoowat <sup>2</sup>, Patcharin Phokasem <sup>2</sup>, Taruedee Jannu <sup>1</sup>, Gerry Renaldi <sup>1,3</sup> and Rajnibhas Sukeaw Samakradhamrongthai <sup>2,3,\*</sup>

<sup>1</sup> Food Science and Technology Program, Faculty of Agro-Industry, Prince of Songkla University, Hat Yai, Songkhla 90110, Thailand; kultida7623@gmail.com (K.K.); saowapaying171041@gmail.com (S.Y.); taruedee404@gmail.com (T.J.); gerryren77@gmail.com (G.R.)

<sup>2</sup> Research Center of Deep Technology in Beekeeping and Bee Products for Sustainable Development Goals (SMART BEE SDGs), Chiang Mai University, Chiang Mai 50200, Thailand; terd.dis@gmail.com (T.D.); patcharin.phokasem@gmail.com (P.P.)

<sup>3</sup> Division of Product Development Technology, Faculty of Agro-Industry, Chiang Mai University, Chiang Mai 50100, Thailand

\* Correspondence: rajnibhas.s@cmu.ac.th

**Table S1.** Experimental design of HGJ.

| Treat-<br>ment | Honey<br>(A; %) | Xylitol<br>(B; %) | Gelatin<br>(C; %) |
|----------------|-----------------|-------------------|-------------------|
| 1              | 30              | 13                | 10                |
| 2              | 32              | 15                | 6                 |
| 3              | 30              | 15                | 8                 |
| 4              | 30              | 17                | 6                 |
| 5              | 32              | 13                | 8                 |
| 6              | 28              | 17                | 8                 |
| 7              | 30              | 15                | 8                 |
| 8              | 30              | 15                | 8                 |
| 9              | 28              | 15                | 10                |

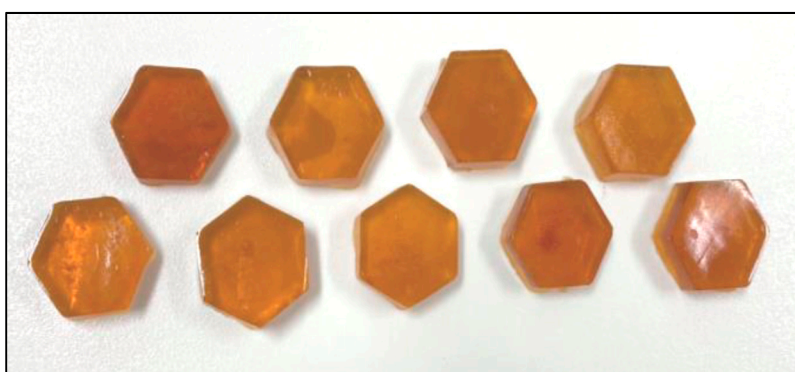

**Figure S1.** The HGJ from 9 formulations

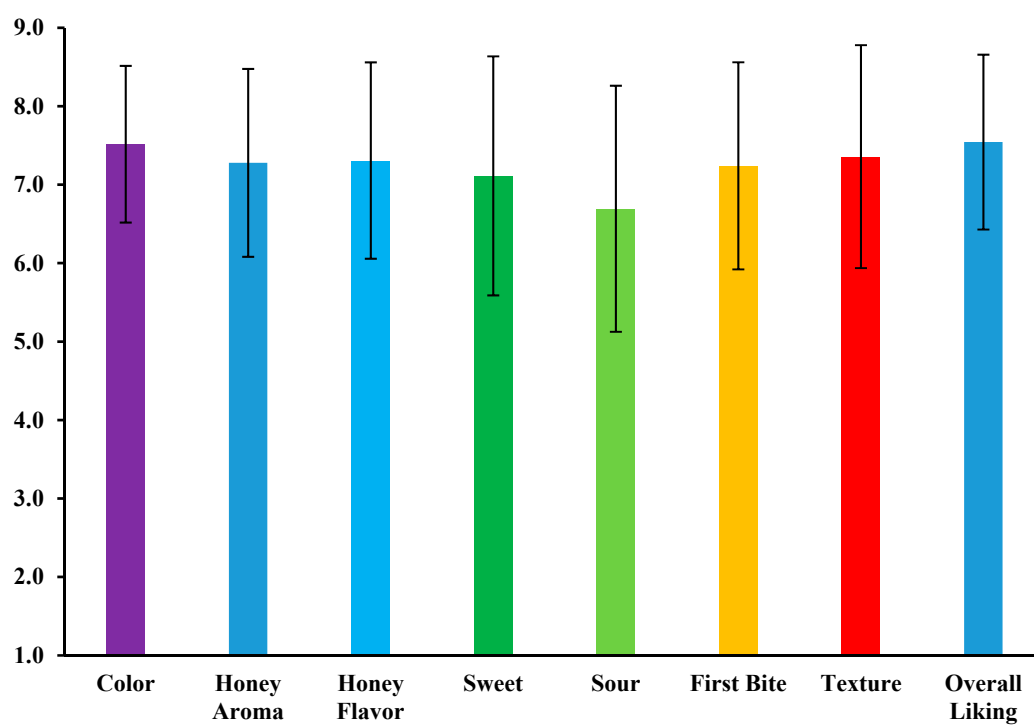

**Figure S2.** The consumer acceptance of HGJ with optimized formula
